# Supplementary material
Source: Springer Nature journal article supplement (https://www.springermedizin.de/resource/supplementary/12885_2014_4908_MOESM3_ESM.pdf/9467688)
Supplement: MOESM3 [file 9467688]

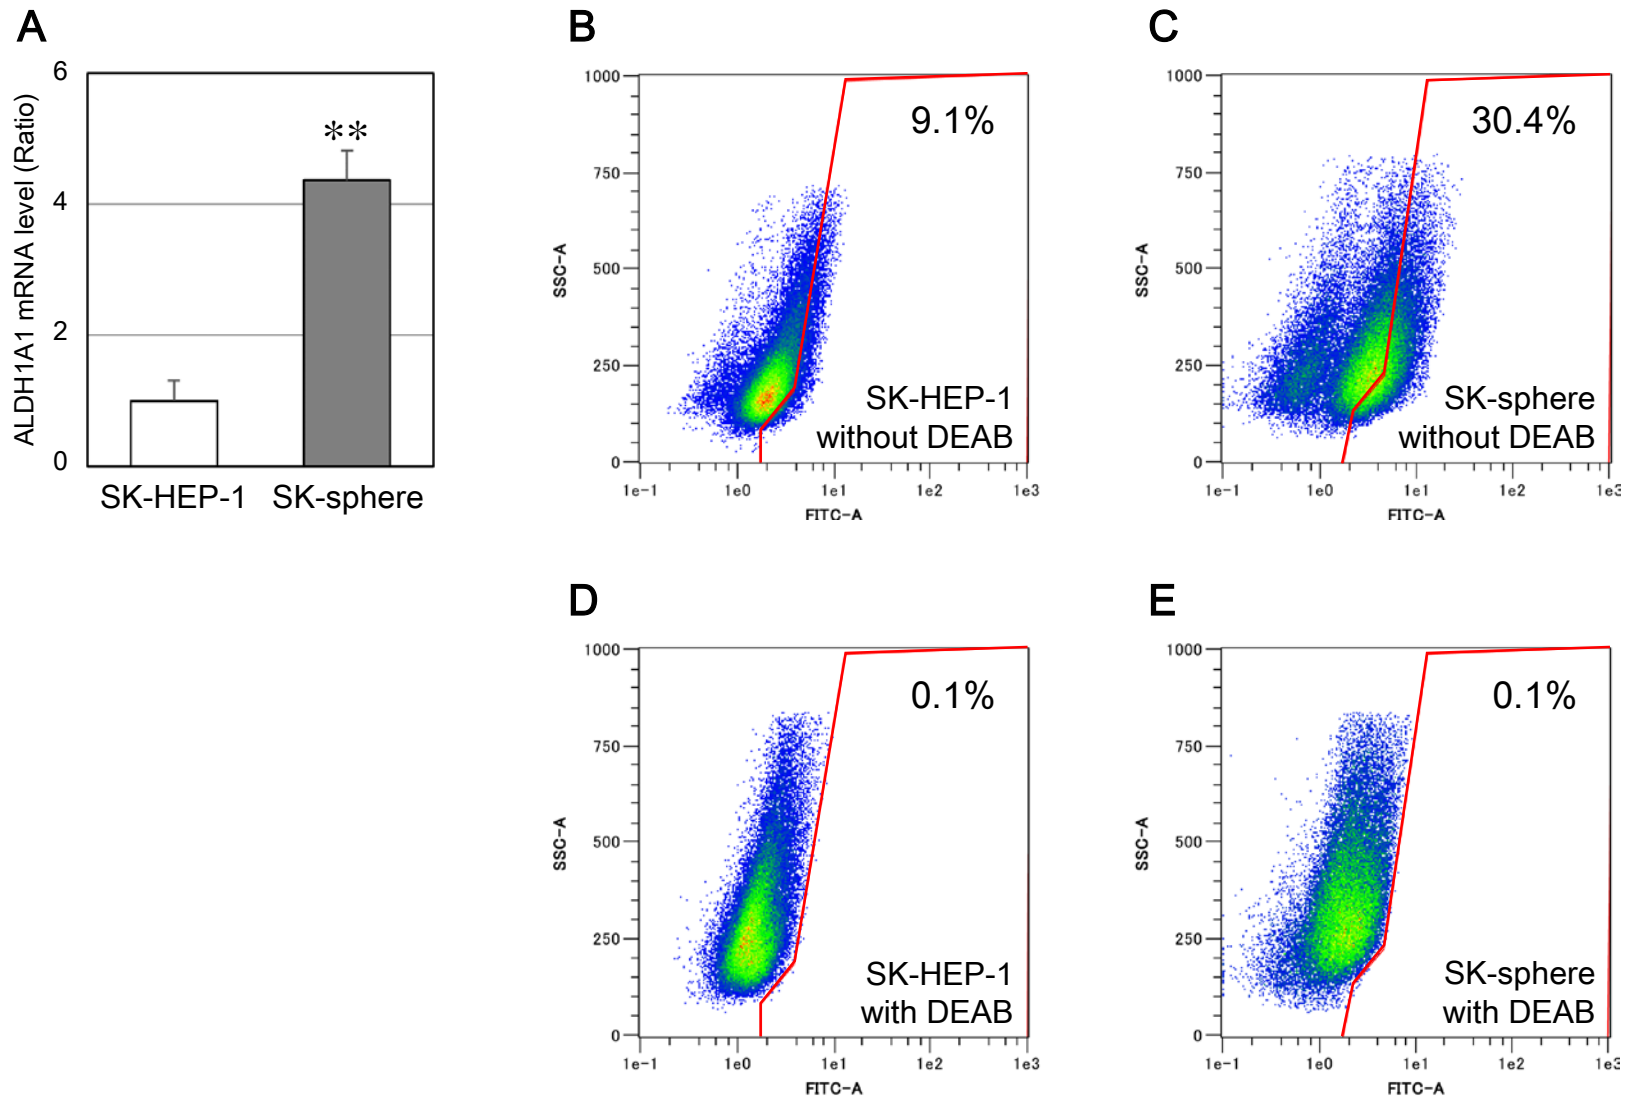

**Supplemental Figure S2** ALDH expression and activity. The mRNA levels of ALDH1A1 were measured with semi-quantitative RT-PCR and represented as the ratio to levels in SK-HEP-1 cells (A).  $**P < 0.05$  with the Mann-Whitney *U*-test. The ALDEFLUOR kit (StemCell Technologies, Durham, NC) was used to analyze the ALDH enzymatic activity in a population of cells. B and C, SK-HEP-1 and SK-sphere cells were suspended in ALDEFLUOR assay buffer containing ALDH substrate and incubated for 40 min at 37 °C. D and E, as a negative control, an aliquot of SK-HEP-1 and SK-sphere cells was treated with 50 mM diethylaminobenzaldehyde (DEAB), a specific ALDH inhibitor.
